# Supplementary material
Source: PubMed Central journal article supplement (PMC3820426)
Supplement: NIHMS515786-supplement-1_si_001.pdf [file NIHMS515786-supplement-1_si_001.pdf]

# Site-Directed Mutagenesis of Catalytic Residues in $N^5$ -Carboxyaminoimidazole Ribonucleotide Synthetase

Mahender B. Dewal, and Steven M. Firestine\*

Department of Pharmaceutical Sciences, Eugene Applebaum College of Pharmacy and Health Sciences,  
Wayne State University, Detroit, MI 48201

## Table of Contents

|                                                                    |   |
|--------------------------------------------------------------------|---|
| PCR primers used for site-directed mutagenesis                     | 1 |
| Limited proteolysis of wild-type and mutant $N^5$ -CAIR synthetase | 2 |

## Primers used for the creation of mutant N<sup>5</sup>-CAIR Synthetase

| Mutant | Primers                                                                                                      |
|--------|--------------------------------------------------------------------------------------------------------------|
| R271A  | 5' tgcgagatcgccagcgcgatccacaactcgggc 3'<br>5' gcccgagttgtggatcgcgctggcgatctcgca 3'                           |
| R271Q  | 5' tgcgagatcgccagc <del>ca</del> aatccacaactcgggc 3'<br>5' gcccgagttgtggat <del>tt</del> gctggcgatctcgca 3'  |
| R271K  | 5' tgcgagatcgccagc <del>ca</del> agatccacaactcgggc 3'<br>5' gcccgagttgtggat <del>ct</del> tgtggcgatctcgca 3' |
| H273A  | 5' atgccagccgcatcgcgaactcgggccactac 3'<br>5' gtagtgcccaggtcgcgatgcggtggcgat 3'                               |
| H273Q  | 5' atgccagccgcatc <del>ca</del> aaaactcgggccactac 3'<br>5' gtagtgcccaggt <del>tt</del> tgatgcggtggcgat 3'    |
| Y152F  | 5'tcgaagaccatggcgttcgatggacgtggaac 3'<br>5'gtttcacgtccatcgaacgccatggtcttca 3'                                |
| K353R  | 5'gccaagcccggccgcgaatggggccacatcacc 3'<br>5'ggtgatgtggccattcggcggccgggcttggc 3'                              |

Primers for the mutations E73A, Y152A, D153A, R155A, and K353A were used from reference 7.

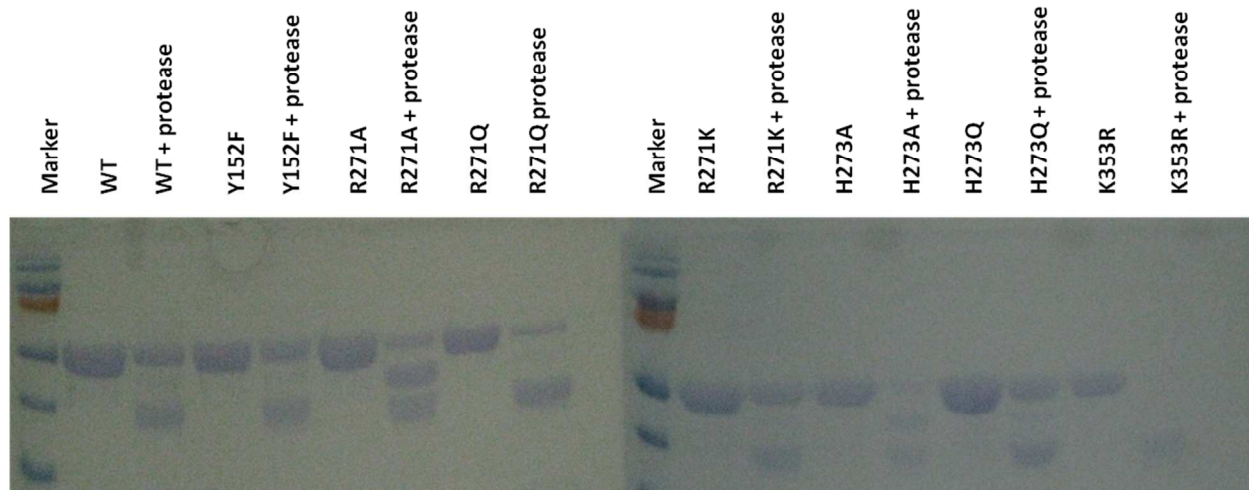

**Supplementary Figure.** SDS-polyacrylamide gel (12%) analysis of subtilisin treatment of wild-type (WT) N<sup>5</sup>-CAIR synthetase and mutants described in the paper. Protocol is described in the experimental section of the paper.

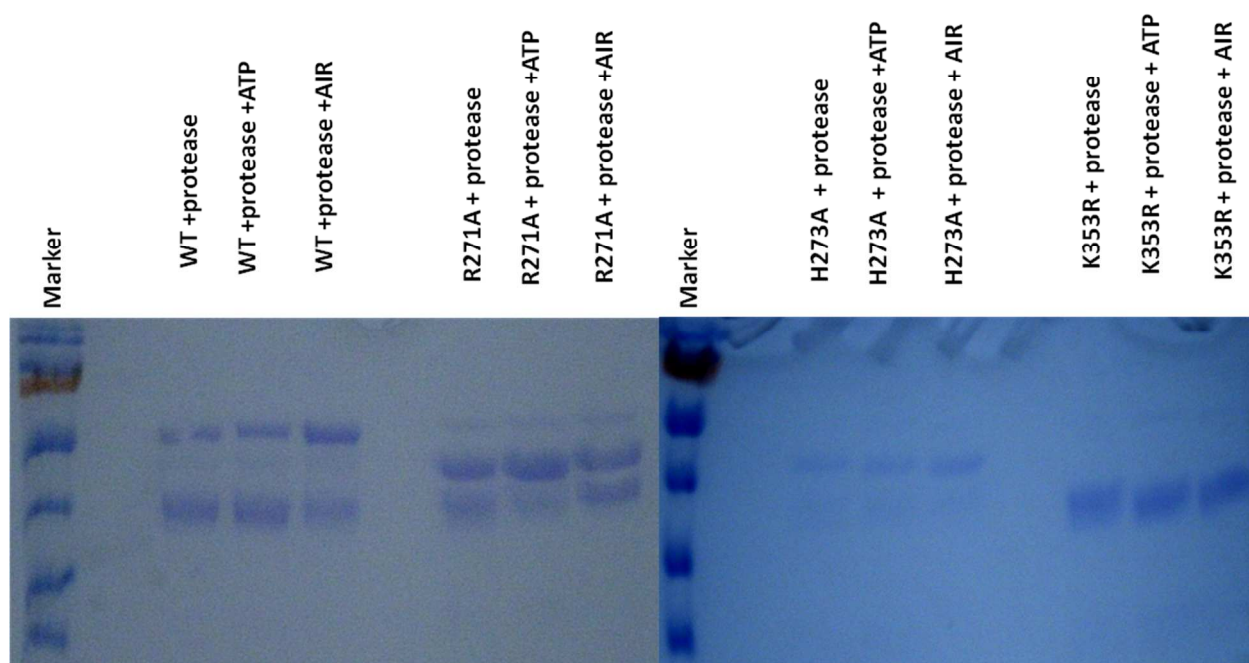

**Supplementary Figure.** SDS-polyacrylamide gel (12%) analysis of subtilisin treatment of wild-type (WT) N<sup>5</sup>-CAIR synthetase and R271A, H273A and K353R mutants in the presence of different substrates. Enzyme samples were incubated with protease, 1 mM of ATP or saturated levels of AIR as determined experimentally from the enzyme kinetics.
